# Supplementary material for: Magmatic connectivity among six Galápagos volcanoes revealed by satellite geodesy
Source: Springer Nature journal article supplement (doi:10.1038/s41467-023-42157-x), 2023-10-19
Supplement: MOESM1 [file 41467_2023_42157_MOESM1_ESM.pdf]

**Supporting Information for “Magmatic Connectivity among Six Galápagos Volcanoes Revealed by Satellite Geodesy, Reddin et al.”**

**Corresponding Authors:** [eeer@leeds.ac.uk](mailto:eeer@leeds.ac.uk), [S.K.Ebmeier@leeds.ac.uk](mailto:S.K.Ebmeier@leeds.ac.uk)

**Contents:**

1. Supplementary Figures 1 to 20
2. Supplementary Tables 1 and 2

# Supplementary Information

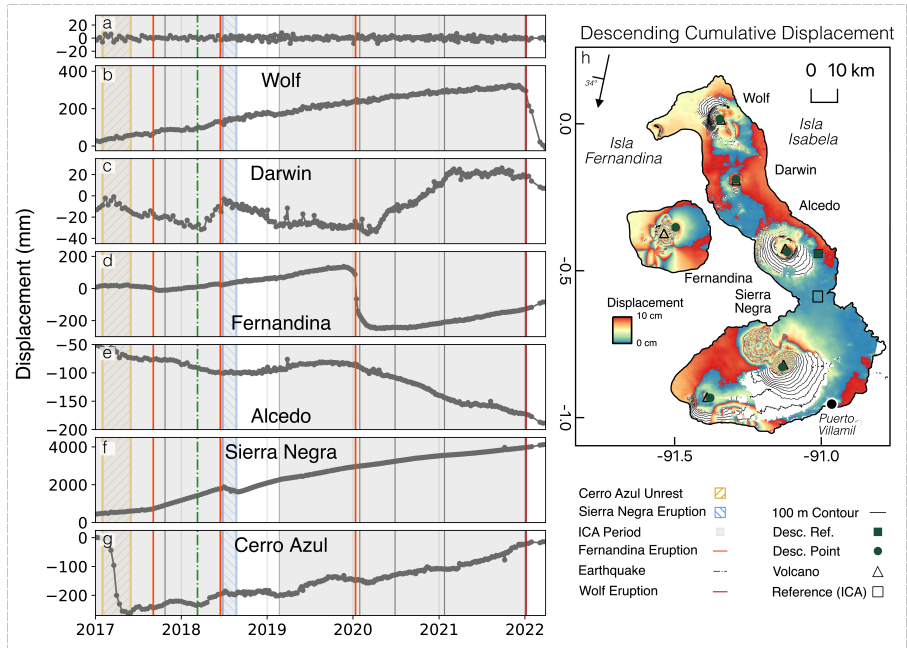

**Fig. S1** Descending Sentinel-1 data for the Western Galápagos. **a**, Time series of displacement of the reference pixel, showing its variation with time. **b–g**, Time series of displacement at each of the major volcanoes of the Western Galápagos, from 07/01/2017–30/03/2022. Annotated are known periods of significant unrest, including unrest at Cerro Azul, and eruptions at each of Fernandina, Sierra Negra, and Wolf. The grey areas denote the periods used for Independent Component Analysis, as presented in this study. **h**, Wrapped cumulative displacement map of the Western Galápagos, across the entire time series. Each fringe corresponds to 10 cm of range change in the satellite line-of-sight. The arrow shows the satellite heading, as well as the average incidence angle. The annotated points refer to pixels used during correlation analysis, while the reference area is used during Independent Component Analysis (Figure 2).

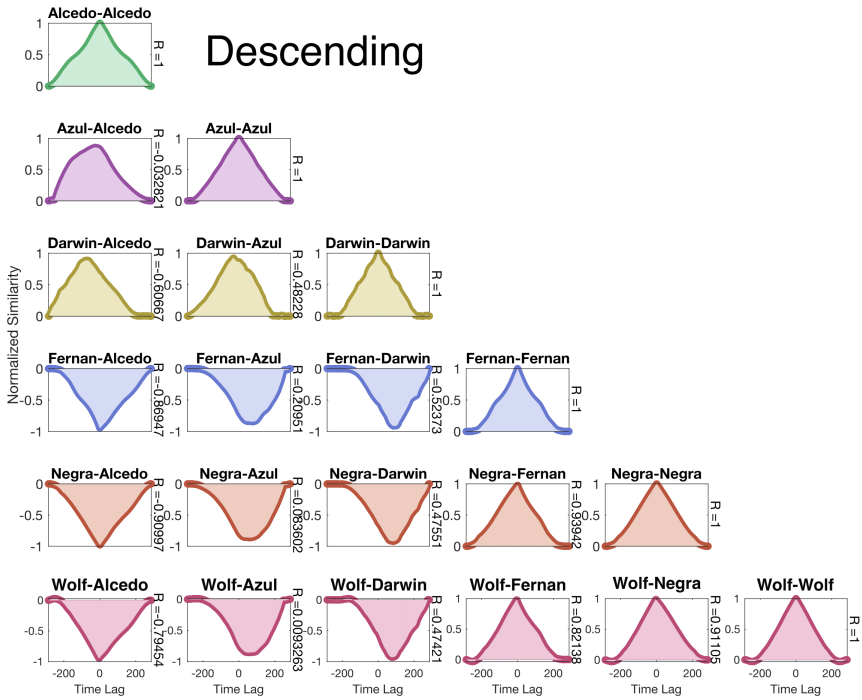

**Fig. S2** Results of cross-correlation analysis for the entire time series of each volcanic pair, in Descending. Similarity between time series is presented on the y-axis, while time lag is presented on the X. The time lag refers to satellite acquisitions between time series points being compared (e.g. a lag of five means there was five satellite acquisitions between points). The correlation coefficient for each pair of time series is annotated on the right y-axis.

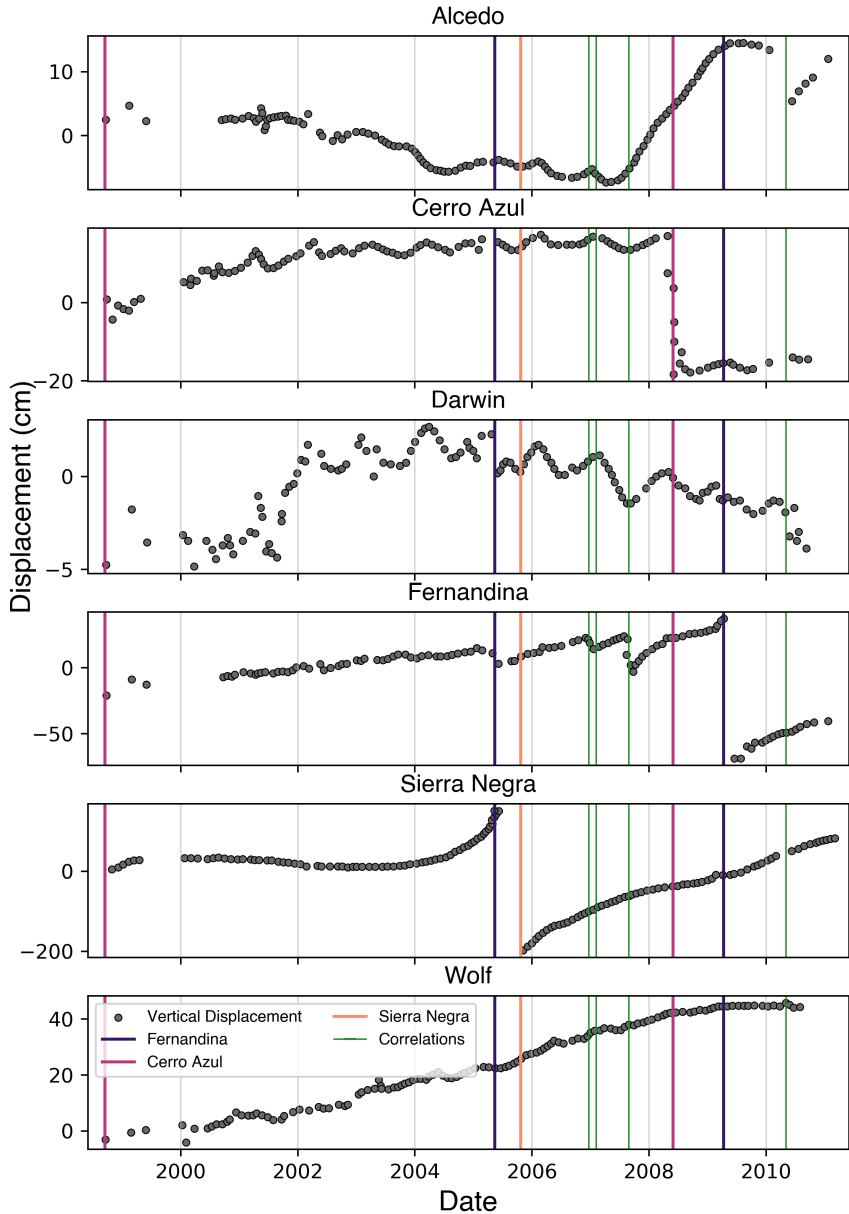

**Fig. S3** Time series of displacement at each volcano in the Western Galápagos from 1998–2011, modified from [S17]. In each case, dots represent vertical displacement, in centimetres, while the vertical lines represent various eruptions. The erupted volcano is denoted by colour, while the episodes of correlated displacements observed by [S17] are marked by vertical green lines. These data are a compilation from multiple satellite missions (ERS-1/2, Envisat, Radarsat, ALOS-1.)

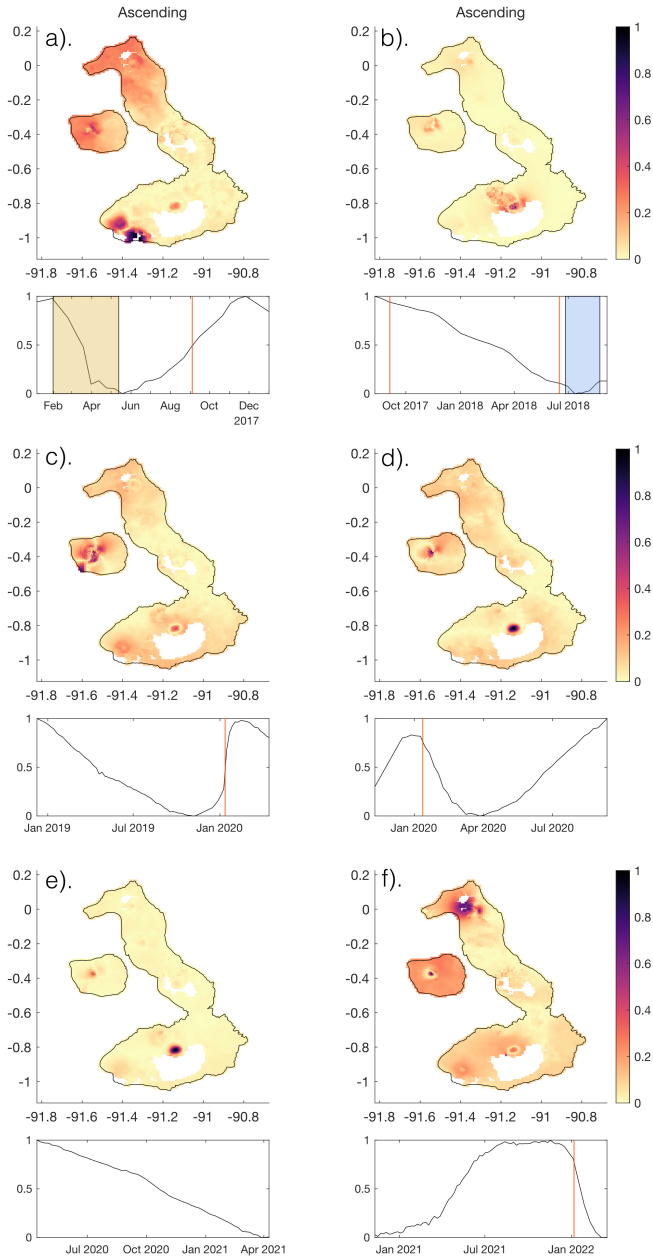

**Fig. S4** Spatially reconstructed unmixing values for each independent component, in Ascending Data; the periods over which we perform ICA is informed by Figure 3. In each map, colors represent the relative strength of the retrieved independent component, providing a spatial representation of temporal data, while the lower panel shows the normalised independent component. There is some temporal overlap between each independent component, to account for overlapping windows in Figure 3. **a**, 10/15/2016–01/02/2018: 2017 unrest at Cerro Azul, and eruption of Fernandina. **b**, 08/11/2017–09/11/2018: eruptions at Fernandina in 2017 and 2018, and Sierra Negra in 2018. **c**, 12/10/2018–04/15/2020: 2020 eruption at Fernandina. **d**, 11/17/2019–09/12/2020: 2020 eruption of Fernandina. **e**, 04/15/2020–04/10/2021: no major volcanic unrest. **f**, 11/11/2020–03/18/2022: 2022 eruption of Wolf.

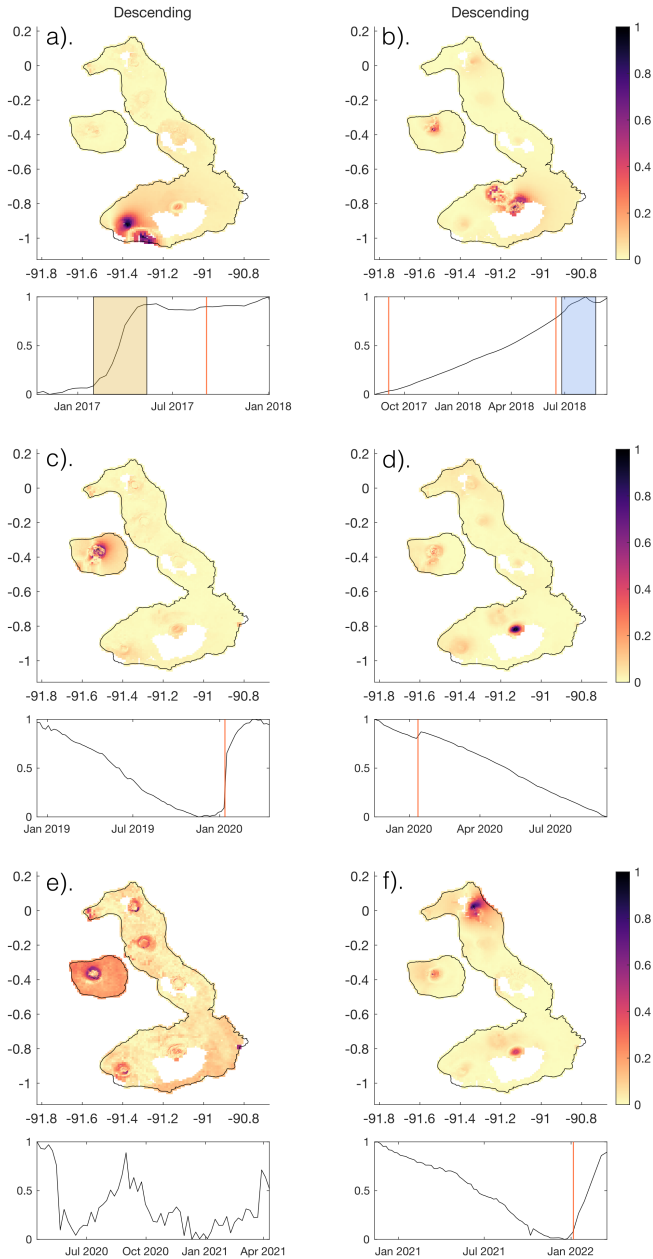

**Fig. S5** Spatially reconstructed unmixing values for each independent component, in Descending Data; the periods over which we perform ICA is informed by Figure 3. In each map, colors represent the relative strength of the retrieved independent component, providing a spatial representation of temporal data, while the lower panel shows the normalised independent component. There is some temporal overlap between each independent component, to account for overlapping windows in Figure 3. **a**, 10/15/2016–01/02/2018: 2017 unrest at Cerro Azul, and eruption of Fernandina. **b**, 08/11/2017–09/11/2018: eruptions at Fernandina in 2017 and 2018, and Sierra Negra in 2018. **c**, 12/10/2018–04/15/2020: 2020 eruption at Fernandina. **d**, 11/17/2019–09/12/2020: 2020 eruption of Fernandina. **e**, 04/15/2020–04/10/2021: no major volcanic unrest. **f**, 11/11/2020–03/18/2022: 2022 eruption of Wolf.

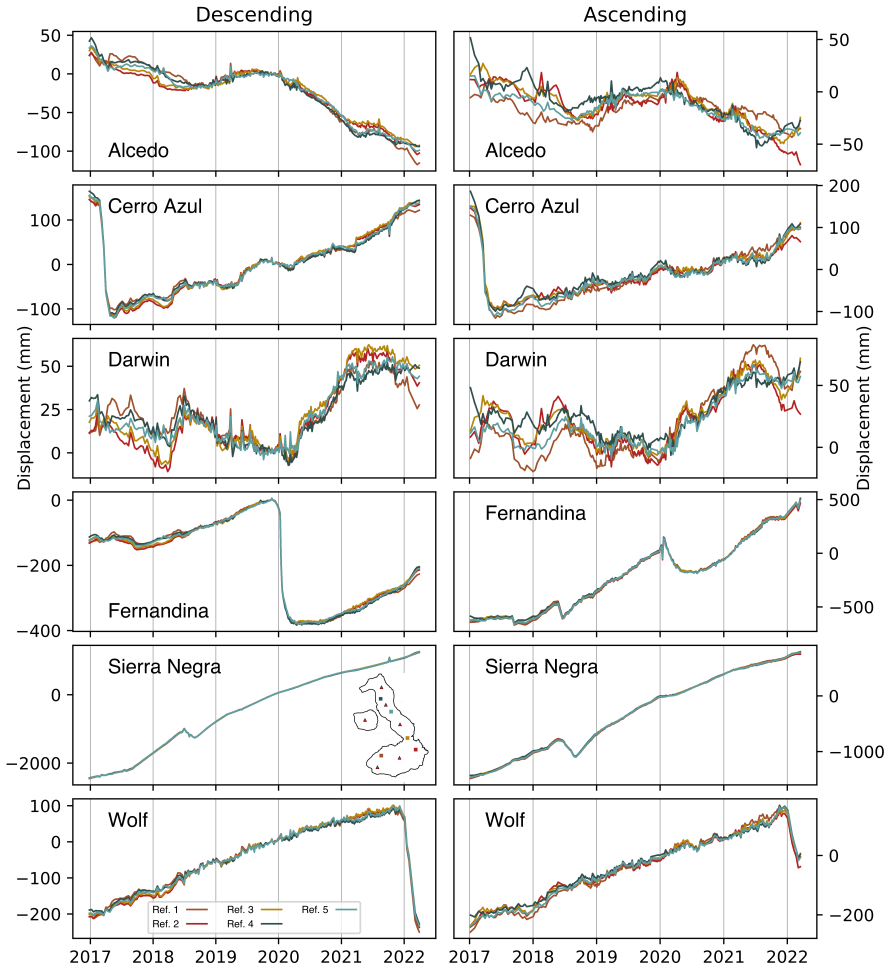

**Fig. S6** Influence of choice of reference pixel, at each volcano. In each case, the plotted pixel is held constant. Descending and Ascending time series are presented in each column, while a different volcano is plotted in each row. Line colours correspond to the plotted reference pixel, the location of which is presented in the inset map.

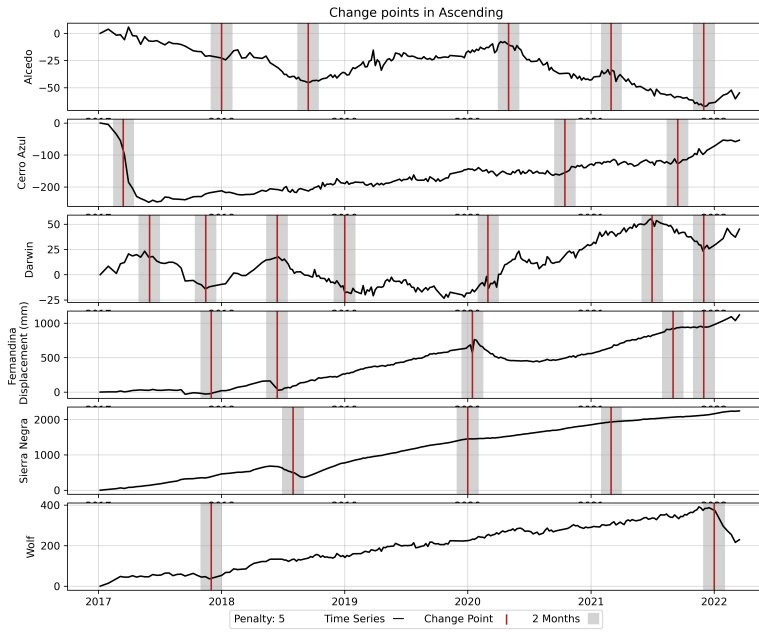

**Fig. S7** Change points at each Western Galápagos volcano in the ascending track direction, from 2017–2022, as identified on the basis of change in rate or direction. Change points are annotated in red, while the grey boxes illustrate a one month period either side of the change point.



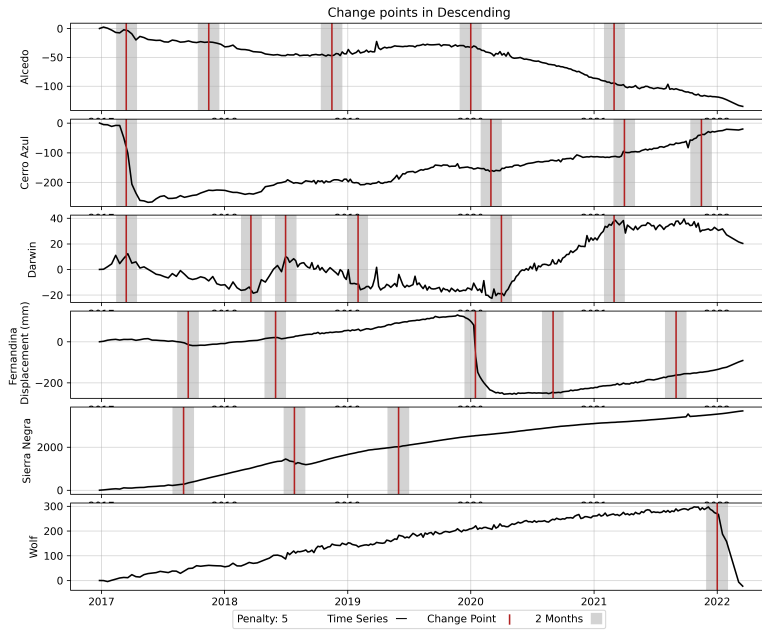

**Fig. S8** Change points at each Western Galápagos volcano in the descending track direction, from 2017–2022, as identified on the basis of change in rate or direction. Change points are annotated in red, while the grey boxes illustrate a one month period either side of the change point.

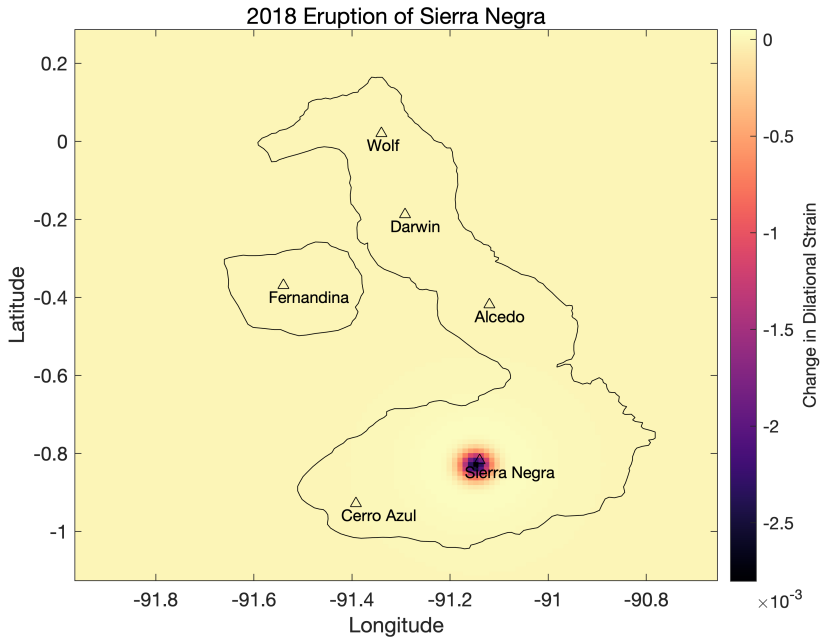

**Fig. S9** Dilational strain associated with the 2018 eruption of Sierra Negra, modelled using Coulomb 3.1 [S48]. The eruption is approximated as a point source with a volume decrease of  $-2 \times 10^8 \text{ m}^3$  [S30]

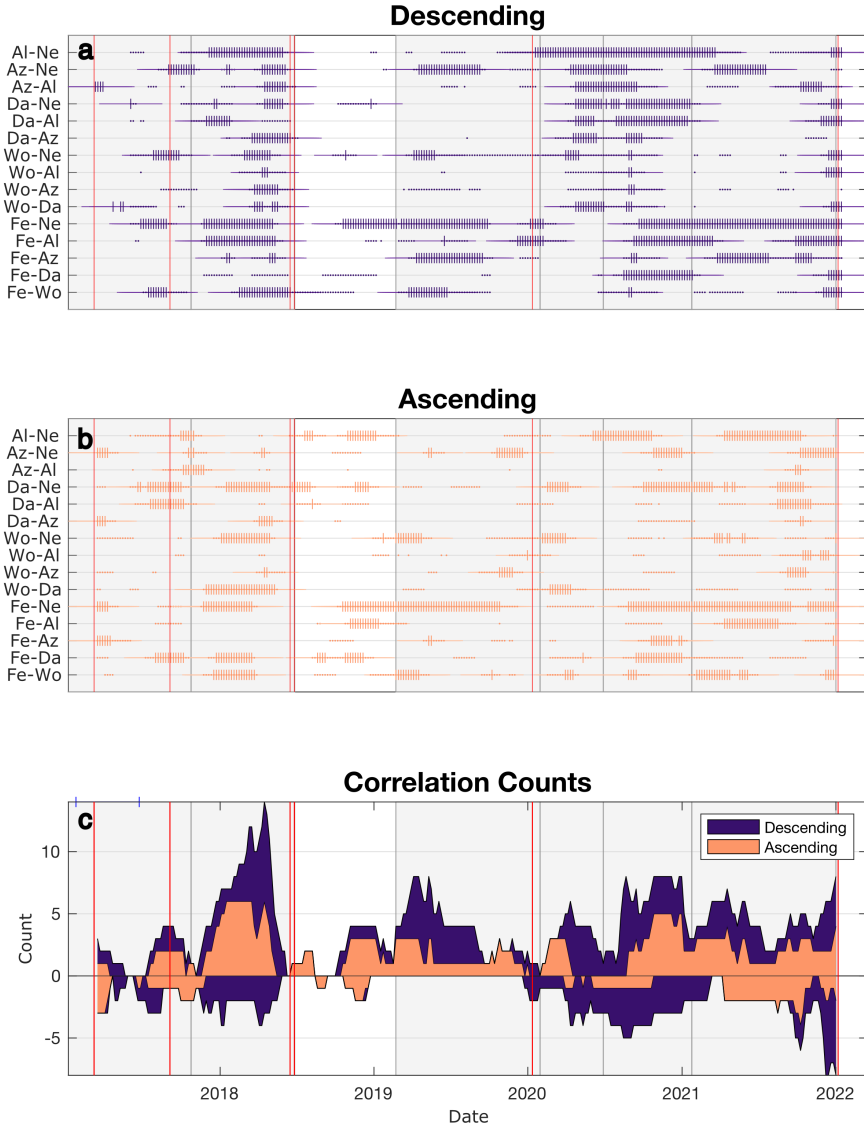

**Fig. S10** Periods of heightened correlation between Western Galápagos volcanoes, determined using windowed correlation analysis, using a window size of 150 days. Red lines illustrate a significant unrest event (e.g. eruption). **a–b**, Pairwise correlation coefficients for Western Galápagos volcanoes. The location of the pixel used to create each time series is illustrated in Figure 1. Vertical lines and dots at each volcanic pair denote a respective correlation coefficients of  $>|0.9|$  and  $>|0.75|$  across the corresponding window, with each point plotted at the centre of the window. Horizontal lines illustrate the temporal extent of each window. **c**, Stacked area plot of correlation coefficients of  $>|0.9|$  to illustrate periods of heightened correlation. These identified periods are separated by grey boxes.

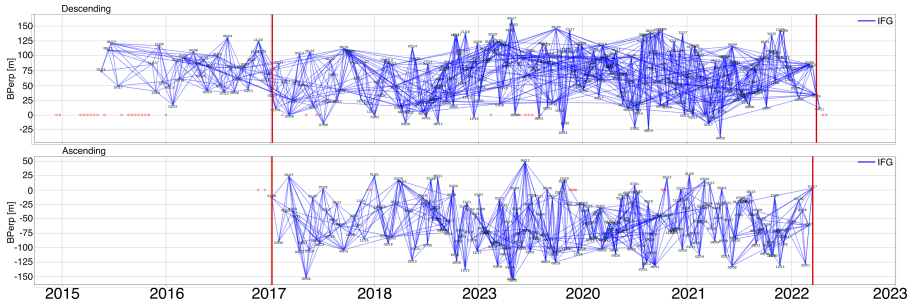

**Fig. S11** Perpendicular baselines for either track direction.

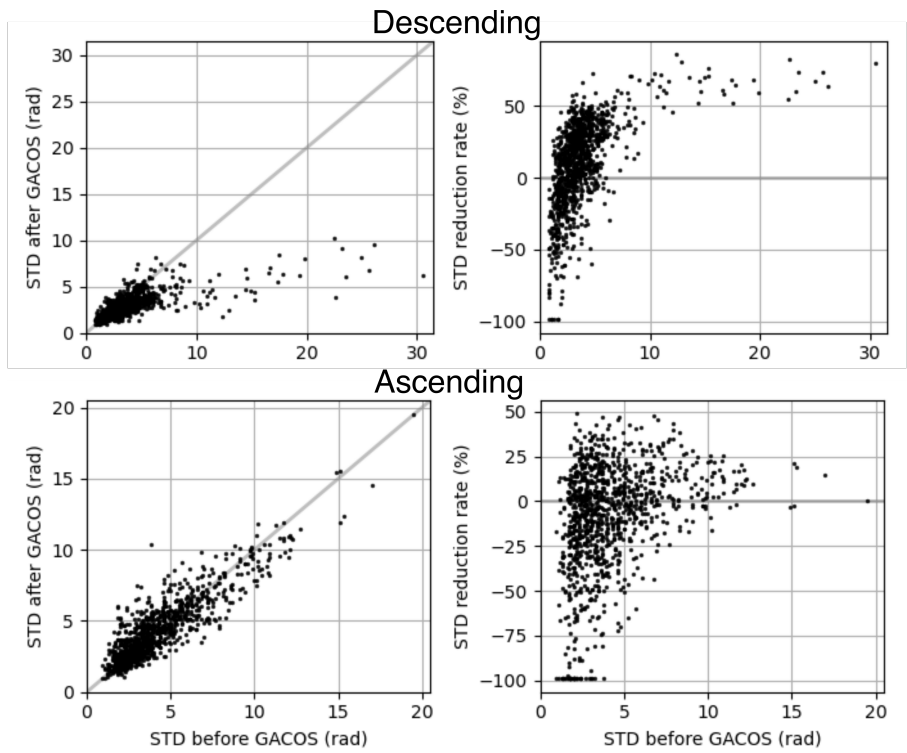

**Fig. S12** Effect of GACOS correction on each data set. The left columns plot the mean standard deviation before correction against that after correction, while the right columns plot the percentage change in standard deviation due to the correction.

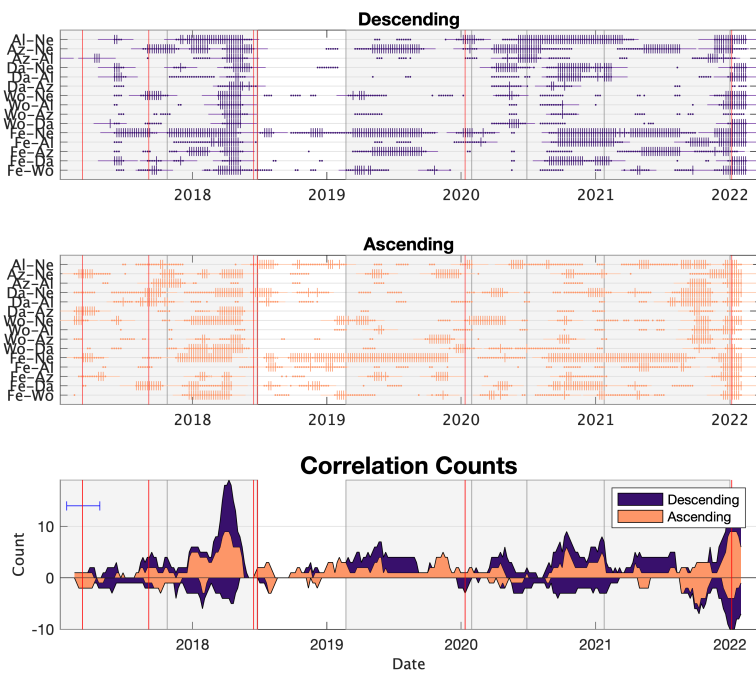

**Fig. S13** Periods of heightened correlation between Western Galápagos volcanoes, determined using windowed correlation analysis. Here, with a window size of 15 acquisitions (approximately 3 months, the extent of which is shown by the horizontal black line), to show the affect of alternating the window size.

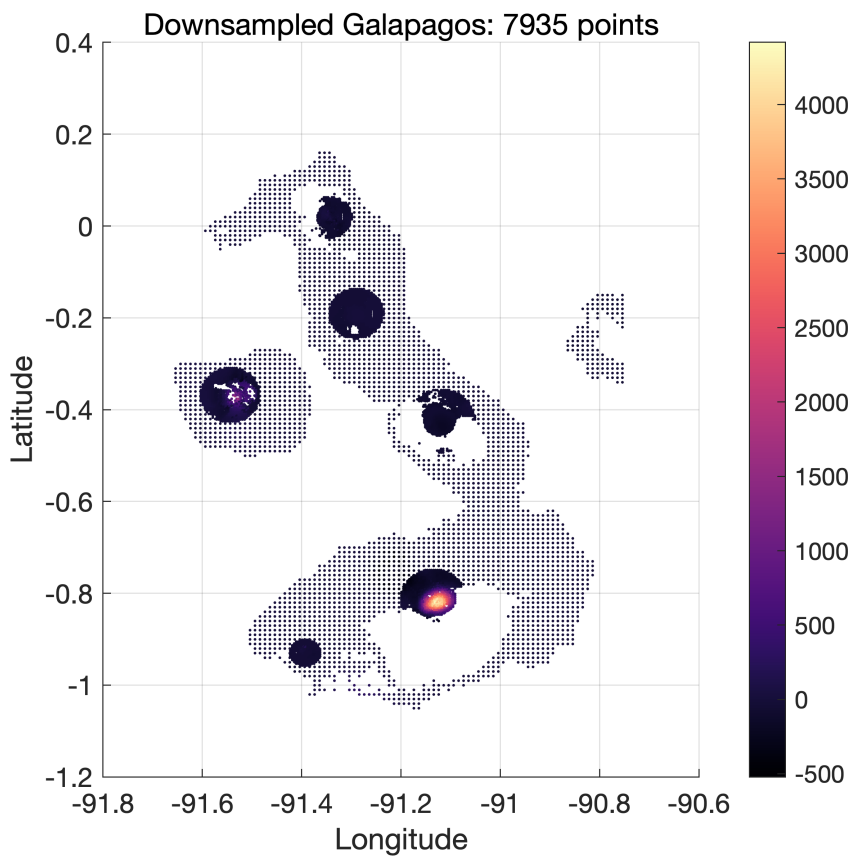

**Fig. S14** The downsampled descending dataset used for Independent Component Analysis. Each point corresponds to the location of one time series of displacement

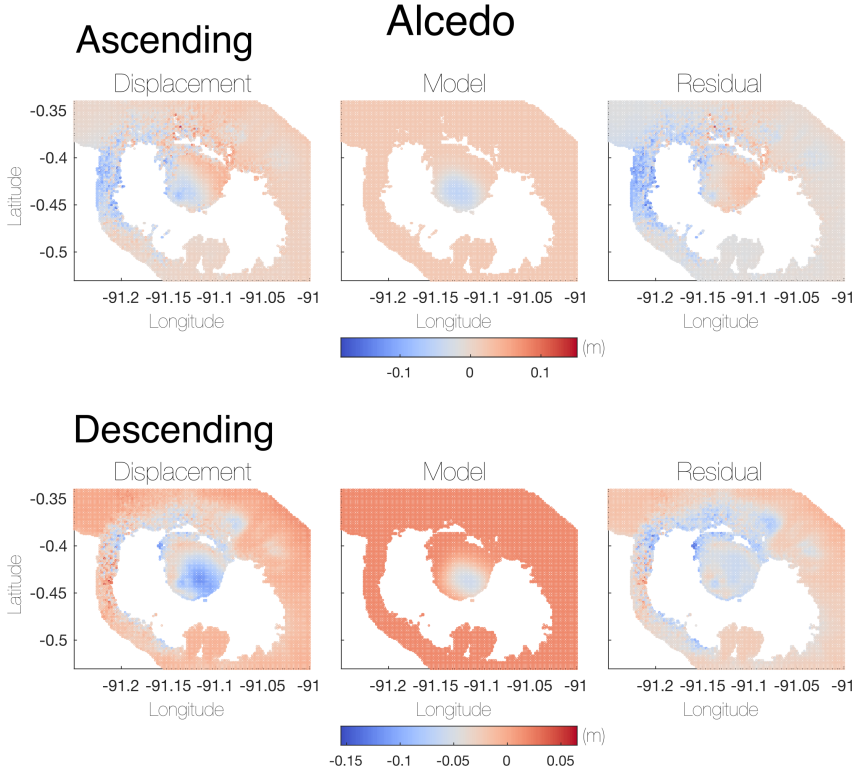

| PARAM.       | OPTIMAL    | 2.5%       | 97.50%     |
|--------------|------------|------------|------------|
| Length (m)   | 3328.7     | 1466.51    | 3770.22    |
| Width (m)    | 4794.14    | 4010.34    | 5185.77    |
| Depth (m)    | 1934.25    | 1665.99    | 3137.51    |
| Strike (m)   | 207.155    | 198.998    | 220.828    |
| X (m)        | -13220.4   | -13455.3   | -12808.8   |
| Y (m)        | -4321.31   | -4648.59   | -3864.57   |
| Opening (m)  | -0.125198  | -0.423341  | -0.105476  |
| InSAR Const. | 0.0182488  | 0.0137716  | 0.0231403  |
| InSAR Const. | -0.0315067 | -0.0342392 | -0.0274933 |

**Fig. S15** Data, model, and residual for the best fitting sill source at Alcedo, from 26/12/2016–01/10/2021. The optimal source parameters, as well as the 2.5% and 97.5% bounds are presented in the underlying table.

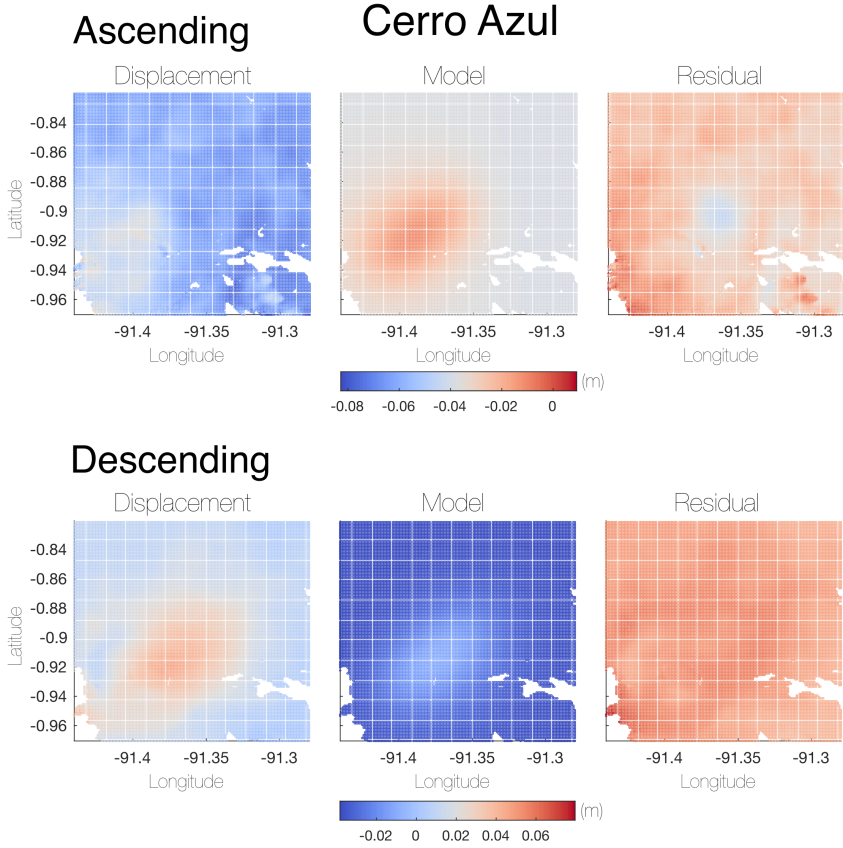

| PARAM.       | OPTIMAL    | 2.5%       | 97.50%     |
|--------------|------------|------------|------------|
| Length (m)   | 271.185    | 150.162    | 313.129    |
| Width (m)    | 7678.99    | 7541.83    | 7771.15    |
| Depth (m)    | 4522.96    | 4303.95    | 4518.23    |
| Strike (m)   | 145.552    | 145.081    | 146.86     |
| X (m)        | 2944.73    | 2858.59    | 2987.62    |
| Y (m)        | -4627.32   | -4672.01   | -4557.39   |
| Opening (m)  | 1.04704    | 0.880844   | 1.71992    |
| InSAR Const. | -0.0382424 | -0.0379602 | -0.0316358 |
| InSAR Const. | 0.0115861  | 0.0116052  | 0.012296   |

**Fig. S16** Data, model, and residual for the best fitting sill source at Cerro Azul, from 02/02/2020–03/01/2021. The optimal source parameters, as well as the 2.5% and 97.5% bounds are presented in the underlying table.



# Darwin

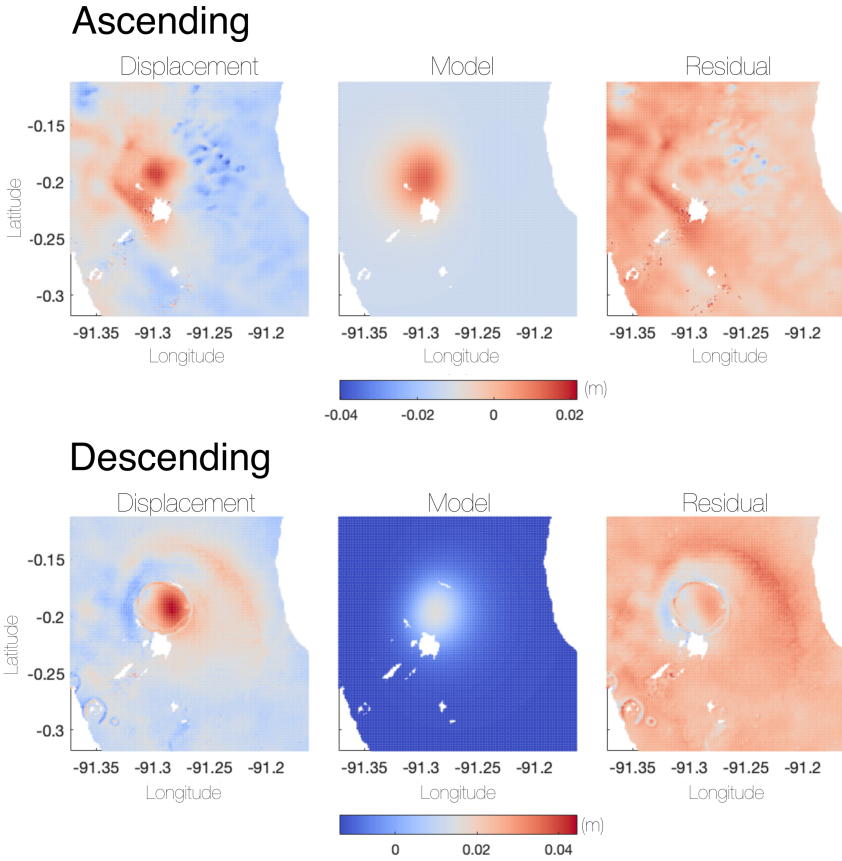

| PARAM.       | OPTIMAL    | 2.5%       | 97.50%     |
|--------------|------------|------------|------------|
| Length (m)   | 188.77     | 124.452    | 1051.43    |
| Width (m)    | 3643.94    | 1259.22    | 4492.73    |
| Depth (m)    | 4264.53    | 4015.04    | 4733.31    |
| Strike (m)   | 105.663    | 90.3973    | 284.478    |
| X (m)        | 2627.74    | 2282.73    | 3442.42    |
| Y (m)        | 9519.86    | 9003.75    | 12161.7    |
| Opening (m)  | 2.13353    | 0.46785    | 4.00451    |
| InSAR Const. | -0.0134238 | -0.014303  | -0.0127242 |
| InSAR Const. | 0.0096809  | 0.00864868 | 0.01064    |

**Fig. S17** Data, model, and residual for the best fitting sill source at Darwin, from 01/07/2020–28/03/2021. The optimal source parameters, as well as the 2.5% and 97.5% bounds are presented in the underlying table.

# Fernandina

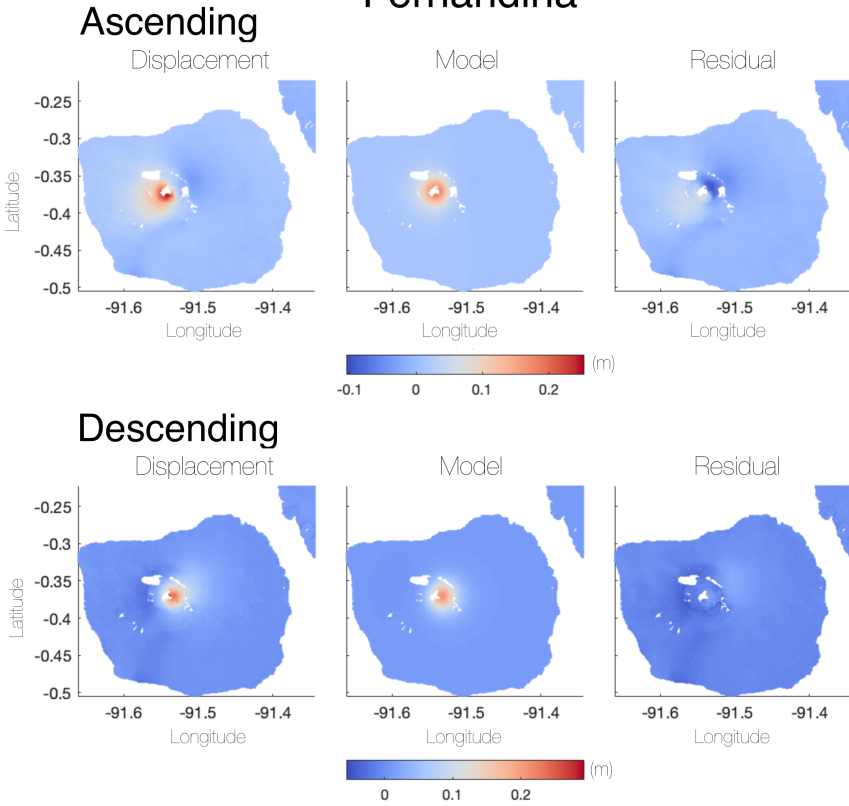

| PARAM.       | OPTIMAL    | 2.5%       | 97.50%     |
|--------------|------------|------------|------------|
| Length (m)   | 896.577    | 707.449    | 1260.96    |
| Width (m)    | 108.212    | 111.66     | 271.713    |
| Depth (m)    | 3106.91    | 3076.91    | 3140.76    |
| Strike (m)   | 51.4147    | 44.9203    | 57.6794    |
| X (m)        | 12757.5    | 12754.9    | 12822.6    |
| Y (m)        | -339.407   | -404.027   | -335.622   |
| Opening (m)  | 49.16      | 14.139     | 49.6947    |
| InSAR Const. | 0.00971126 | 0.00922391 | 0.0104413  |
| InSAR Const. | 0.00482871 | 0.00456167 | 0.00502437 |

**Fig. S18** Data, model, and residual for the best fitting sill source at Fernandina, from 01/07/2020–28/03/2021. The optimal source parameters, as well as the 2.5% and 97.5% bounds are presented in the underlying table.

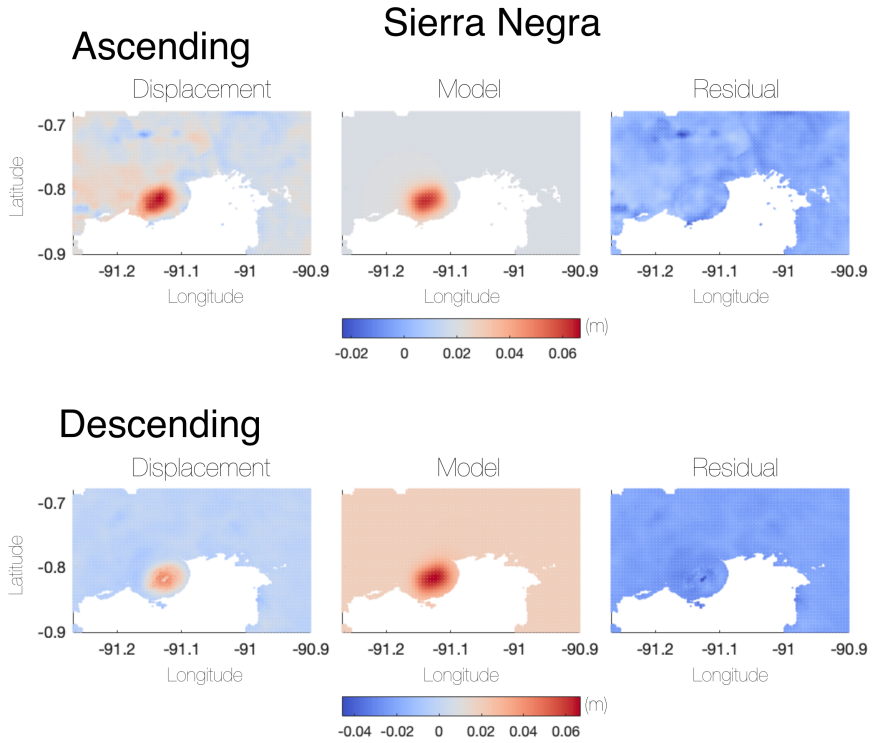

| PARAM.       | OPTIMAL    | 2.5%       | 97.50%     |
|--------------|------------|------------|------------|
| Length (m)   | 128.048    | 104.925    | 923.512    |
| Width (m)    | 4553.33    | 4123.59    | 4930.47    |
| Depth (m)    | 1957.84    | 1796.54    | 2082.25    |
| Strike (m)   | 218.158    | 214.464    | 221.842    |
| X (m)        | 13783      | 13417.1    | 14179.7    |
| Y (m)        | -6381.72   | -6582.94   | -6222.33   |
| Opening (m)  | 1.05408    | 0.14301    | 1.3071     |
| InSAR Const. | -0.0086843 | -0.0093517 | -0.0077237 |
| InSAR Const. | 0.00391561 | 0.00308953 | 0.00466889 |

**Fig. S19** Data, model, and residual for the best fitting sill source at Sierra Negra, from 29/12/2020–03/02/2021. The optimal source parameters, as well as the 2.5% and 97.5% bounds are presented in the underlying table.

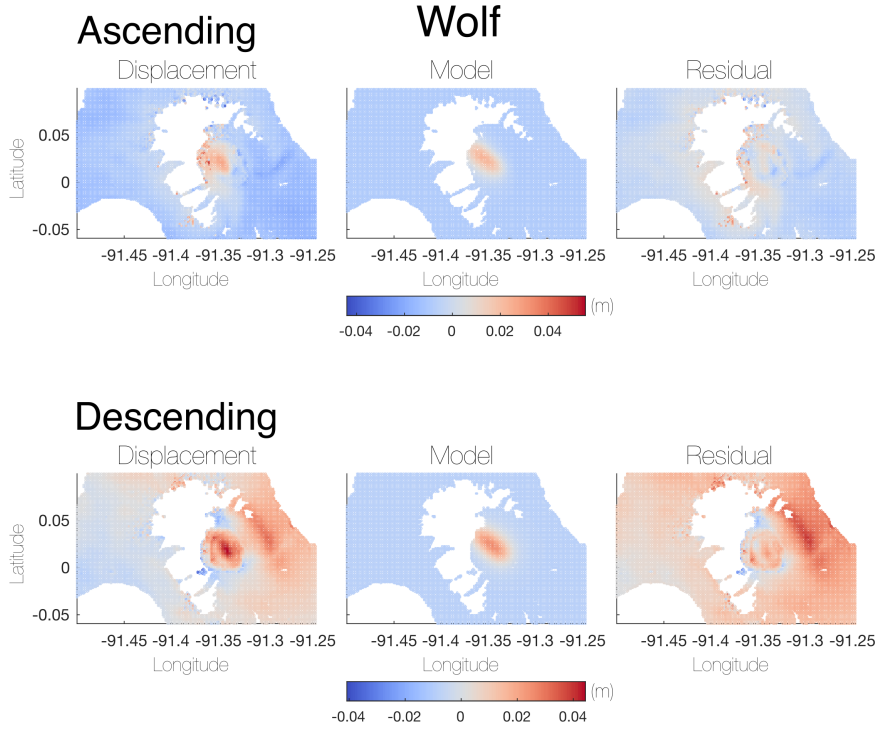

| PARAM.       | OPTIMAL    | 2.5%       | 97.50%     |
|--------------|------------|------------|------------|
| Length (m)   | 128.048    | 104.925    | 923.512    |
| Width (m)    | 4553.33    | 4123.59    | 4930.47    |
| Depth (m)    | 1957.84    | 1796.54    | 2082.25    |
| Strike (m)   | 218.158    | 214.464    | 221.842    |
| X (m)        | 13783      | 13417.1    | 14179.7    |
| Y (m)        | -6381.72   | -6582.94   | -6222.33   |
| Opening (m)  | 1.05408    | 0.14301    | 1.3071     |
| InSAR Const. | -0.0086843 | -0.0093517 | -0.0077237 |
| InSAR Const. | 0.00391561 | 0.00308953 | 0.00466889 |

**Fig. S20** Data, model, and residual for the best fitting sill source at Wolf, from 01/06/2020–27/05/2021. The optimal source parameters, as well as the 2.5% and 97.5% bounds are presented in the underlying table.

|            |            |            |            |            |            |            |
|------------|------------|------------|------------|------------|------------|------------|
| 07/01/2017 | 27/03/2018 | 28/12/2018 | 31/08/2019 | 21/04/2020 | 29/11/2020 | 09/07/2021 |
| 19/01/2017 | 08/04/2018 | 03/01/2019 | 06/09/2019 | 27/04/2020 | 05/12/2020 | 15/07/2021 |
| 31/01/2017 | 20/04/2018 | 09/01/2019 | 12/09/2019 | 03/05/2020 | 11/12/2020 | 21/07/2021 |
| 12/02/2017 | 02/05/2018 | 15/01/2019 | 18/09/2019 | 09/05/2020 | 17/12/2020 | 27/07/2021 |
| 24/02/2017 | 14/05/2018 | 21/01/2019 | 30/09/2019 | 15/05/2020 | 23/12/2020 | 02/08/2021 |
| 08/03/2017 | 26/05/2018 | 27/01/2019 | 06/10/2019 | 21/05/2020 | 29/12/2020 | 08/08/2021 |
| 20/03/2017 | 07/06/2018 | 02/02/2019 | 12/10/2019 | 27/05/2020 | 04/01/2021 | 14/08/2021 |
| 01/04/2017 | 19/06/2018 | 08/02/2019 | 18/10/2019 | 02/06/2020 | 10/01/2021 | 20/08/2021 |
| 13/04/2017 | 01/07/2018 | 20/02/2019 | 24/10/2019 | 08/06/2020 | 16/01/2021 | 26/08/2021 |
| 25/04/2017 | 07/07/2018 | 26/02/2019 | 30/10/2019 | 14/06/2020 | 22/01/2021 | 01/09/2021 |
| 07/05/2017 | 13/07/2018 | 04/03/2019 | 05/11/2019 | 20/06/2020 | 28/01/2021 | 07/09/2021 |
| 19/05/2017 | 25/07/2018 | 10/03/2019 | 17/11/2019 | 26/06/2020 | 03/02/2021 | 13/09/2021 |
| 31/05/2017 | 31/07/2018 | 16/03/2019 | 23/11/2019 | 02/07/2020 | 09/02/2021 | 19/09/2021 |
| 12/06/2017 | 06/08/2018 | 22/03/2019 | 29/11/2019 | 08/07/2020 | 15/02/2021 | 25/09/2021 |
| 24/06/2017 | 12/08/2018 | 28/03/2019 | 05/12/2019 | 14/07/2020 | 21/02/2021 | 01/10/2021 |
| 06/07/2017 | 18/08/2018 | 03/04/2019 | 11/12/2019 | 20/07/2020 | 27/02/2021 | 07/10/2021 |
| 18/07/2017 | 24/08/2018 | 09/04/2019 | 17/12/2019 | 26/07/2020 | 05/03/2021 | 13/10/2021 |
| 30/07/2017 | 30/08/2018 | 15/04/2019 | 23/12/2019 | 01/08/2020 | 11/03/2021 | 19/10/2021 |
| 11/08/2017 | 05/09/2018 | 21/04/2019 | 29/12/2019 | 07/08/2020 | 17/03/2021 | 25/10/2021 |
| 23/08/2017 | 11/09/2018 | 27/04/2019 | 04/01/2020 | 13/08/2020 | 23/03/2021 | 31/10/2021 |
| 04/09/2017 | 17/09/2018 | 03/05/2019 | 10/01/2020 | 19/08/2020 | 29/03/2021 | 06/11/2021 |
| 16/09/2017 | 23/09/2018 | 09/05/2019 | 16/01/2020 | 25/08/2020 | 04/04/2021 | 12/11/2021 |
| 28/09/2017 | 29/09/2018 | 21/05/2019 | 22/01/2020 | 31/08/2020 | 10/04/2021 | 18/11/2021 |
| 10/10/2017 | 05/10/2018 | 27/05/2019 | 28/01/2020 | 06/09/2020 | 16/04/2021 | 24/11/2021 |
| 22/10/2017 | 11/10/2018 | 02/06/2019 | 03/02/2020 | 12/09/2020 | 22/04/2021 | 06/12/2021 |
| 03/11/2017 | 17/10/2018 | 14/06/2019 | 09/02/2020 | 18/09/2020 | 28/04/2021 | 12/12/2021 |
| 15/11/2017 | 23/10/2018 | 20/06/2019 | 15/02/2020 | 24/09/2020 | 04/05/2021 | 18/12/2021 |
| 27/11/2017 | 29/10/2018 | 26/06/2019 | 21/02/2020 | 30/09/2020 | 10/05/2021 | 24/12/2021 |
| 09/12/2017 | 04/11/2018 | 02/07/2019 | 27/02/2020 | 06/10/2020 | 16/05/2021 | 05/01/2022 |
| 21/12/2017 | 10/11/2018 | 14/07/2019 | 04/03/2020 | 12/10/2020 | 22/05/2021 | 17/01/2022 |
| 02/01/2018 | 16/11/2018 | 20/07/2019 | 10/03/2020 | 18/10/2020 | 28/05/2021 | 29/01/2022 |
| 14/01/2018 | 22/11/2018 | 26/07/2019 | 16/03/2020 | 24/10/2020 | 03/06/2021 | 06/03/2022 |
| 26/01/2018 | 28/11/2018 | 01/08/2019 | 22/03/2020 | 30/10/2020 | 09/06/2021 | 18/03/2022 |
| 07/02/2018 | 04/12/2018 | 07/08/2019 | 28/03/2020 | 05/11/2020 | 15/06/2021 | 30/03/2022 |
| 19/02/2018 | 10/12/2018 | 13/08/2019 | 03/04/2020 | 11/11/2020 | 21/06/2021 |            |
| 03/03/2018 | 16/12/2018 | 19/08/2019 | 09/04/2020 | 17/11/2020 | 27/06/2021 |            |
| 15/03/2018 | 22/12/2018 | 25/08/2019 | 15/04/2020 | 23/11/2020 | 03/07/2021 |            |

**Table S1** Dates used in the Descending data set (256 in total). These data are taken from both Sentinel-1A and Sentinel-1B, using orbit number 128, covering the islands of both Fernandina and Isabela

|            |            |            |            |            |            |            |
|------------|------------|------------|------------|------------|------------|------------|
| 06/01/2017 | 01/05/2018 | 14/01/2019 | 30/08/2019 | 26/04/2020 | 22/12/2020 | 13/08/2021 |
| 30/01/2017 | 13/05/2018 | 20/01/2019 | 05/09/2019 | 02/05/2020 | 28/12/2020 | 19/08/2021 |
| 23/02/2017 | 25/05/2018 | 26/01/2019 | 11/09/2019 | 08/05/2020 | 03/01/2021 | 25/08/2021 |
| 07/03/2017 | 18/06/2018 | 01/02/2019 | 17/09/2019 | 14/05/2020 | 09/01/2021 | 31/08/2021 |
| 19/03/2017 | 30/06/2018 | 19/02/2019 | 23/09/2019 | 20/05/2020 | 15/01/2021 | 06/09/2021 |
| 31/03/2017 | 06/07/2018 | 25/02/2019 | 29/09/2019 | 26/05/2020 | 27/01/2021 | 12/09/2021 |
| 12/04/2017 | 12/07/2018 | 03/03/2019 | 05/10/2019 | 01/06/2020 | 02/02/2021 | 18/09/2021 |
| 24/04/2017 | 18/07/2018 | 09/03/2019 | 11/10/2019 | 07/06/2020 | 08/02/2021 | 24/09/2021 |
| 06/05/2017 | 24/07/2018 | 15/03/2019 | 23/10/2019 | 13/06/2020 | 14/02/2021 | 30/09/2021 |
| 18/05/2017 | 30/07/2018 | 21/03/2019 | 29/10/2019 | 19/06/2020 | 20/02/2021 | 06/10/2021 |
| 30/05/2017 | 05/08/2018 | 27/03/2019 | 04/11/2019 | 25/06/2020 | 26/02/2021 | 12/10/2021 |
| 11/06/2017 | 11/08/2018 | 02/04/2019 | 10/11/2019 | 01/07/2020 | 04/03/2021 | 18/10/2021 |
| 23/06/2017 | 17/08/2018 | 08/04/2019 | 16/12/2019 | 07/07/2020 | 10/03/2021 | 24/10/2021 |
| 05/07/2017 | 23/08/2018 | 14/04/2019 | 22/12/2019 | 13/07/2020 | 16/03/2021 | 30/10/2021 |
| 17/07/2017 | 04/09/2018 | 20/04/2019 | 28/12/2019 | 25/07/2020 | 22/03/2021 | 05/11/2021 |
| 29/07/2017 | 16/09/2018 | 26/04/2019 | 03/01/2020 | 31/07/2020 | 28/03/2021 | 11/11/2021 |
| 10/08/2017 | 22/09/2018 | 02/05/2019 | 09/01/2020 | 12/08/2020 | 09/04/2021 | 17/11/2021 |
| 22/08/2017 | 28/09/2018 | 08/05/2019 | 15/01/2020 | 18/08/2020 | 15/04/2021 | 23/11/2021 |
| 03/09/2017 | 04/10/2018 | 14/05/2019 | 21/01/2020 | 24/08/2020 | 21/04/2021 | 29/11/2021 |
| 15/09/2017 | 10/10/2018 | 20/05/2019 | 27/01/2020 | 30/08/2020 | 27/04/2021 | 05/12/2021 |
| 09/10/2017 | 16/10/2018 | 26/05/2019 | 02/02/2020 | 05/09/2020 | 03/05/2021 | 11/12/2021 |
| 21/10/2017 | 22/10/2018 | 01/06/2019 | 08/02/2020 | 11/09/2020 | 09/05/2021 | 17/12/2021 |
| 02/11/2017 | 28/10/2018 | 13/06/2019 | 14/02/2020 | 17/09/2020 | 15/05/2021 | 04/01/2022 |
| 14/11/2017 | 03/11/2018 | 19/06/2019 | 20/02/2020 | 29/09/2020 | 21/05/2021 | 28/01/2022 |
| 26/11/2017 | 09/11/2018 | 25/06/2019 | 26/02/2020 | 23/10/2020 | 27/05/2021 | 09/02/2022 |
| 01/01/2018 | 15/11/2018 | 01/07/2019 | 03/03/2020 | 29/10/2020 | 08/06/2021 | 21/02/2022 |
| 13/01/2018 | 21/11/2018 | 07/07/2019 | 09/03/2020 | 04/11/2020 | 14/06/2021 | 05/03/2022 |
| 25/01/2018 | 27/11/2018 | 13/07/2019 | 15/03/2020 | 10/11/2020 | 20/06/2021 | 17/03/2022 |
| 06/02/2018 | 03/12/2018 | 19/07/2019 | 21/03/2020 | 16/11/2020 | 26/06/2021 |            |
| 18/02/2018 | 09/12/2018 | 25/07/2019 | 27/03/2020 | 22/11/2020 | 02/07/2021 |            |
| 02/03/2018 | 21/12/2018 | 31/07/2019 | 02/04/2020 | 28/11/2020 | 08/07/2021 |            |
| 14/03/2018 | 27/12/2018 | 06/08/2019 | 08/04/2020 | 04/12/2020 | 14/07/2021 |            |
| 26/03/2018 | 02/01/2019 | 18/08/2019 | 14/04/2020 | 10/12/2020 | 26/07/2021 |            |
| 07/04/2018 | 08/01/2019 | 24/08/2019 | 20/04/2020 | 16/12/2020 | 07/08/2021 |            |

**Table S2** Dates used in the Ascending data set (204 in total). These data are taken from both Sentinel-1A and Sentinel-1B, using orbit number 106, covering the islands of both Fernandina and Isabela
